# Supplementary material for: Noncanonical electromechanical coupling paths in cardiac hERG potassium channel
Source: Nat Commun. 2023 Feb 27;14:1110. doi: 10.1038/s41467-023-36730-7 (PMC9971164; doi:10.1038/s41467-023-36730-7)
Supplement: Supplementary file 3 — Source Data [file 41467_2023_36730_MOESM3_ESM.xlsx]

## Sheet: Figure2
		Figure 2. Family of current traces and conductance versus voltage relationship for mutants comprising the noncanonical path in hERG.
	Data for Fig 2j
	WT		T425L		L524R		A527R		L529H		L532H		W563L		A614G		T618L
Voltage (mV)	Normalized G	Standard Deviation	Normalized G	Standard Deviation	Normalized G	Standard Deviation	Normalized G	Standard Deviation	Normalized G	Standard Deviation	Normalized G	Standard Deviation	Normalized G	Standard Deviation	Normalized G	Standard Deviation	Normalized G	Standard Deviation
-100	0.00542	0.0065	0.00535	0.0063	0.00593	0.01267	0.01321	0.01039	0	0	0.00223	0.00265	0.00456	0.00666	0.00139	0.00173	0.00226	0.00166
-90	0.00263	0.0049	0.00412	0.00635	0.00675	0.01052	0.00476	0.00231	0.0079	0.00185	0.00209	0.00316	0.00726	0.00696	0.00211	0.00201	0.00188	0.00292
-80	0.00184	0.000725684	0.00447	0.006	0.01398	0.0111	0	0	0.04228	0.0138	0.00139	0.00183	0.01636	0.01612	0.00465	0.00392	0.00472	0.0074
-70	0.00274	0.00189	0.0055	0.0049	0.04566	0.02511	0.00444	0.0014	0.17713	0.03758	0.00883	0.00765	0.08168	0.018	0.00554	0.00645	0.00979	0.01202
-60	0.01249	0.00712	0.00483	0.00478	0.11573	0.06279	0.03321	0.01203	0.42382	0.05299	0.03264	0.01394	0.2536	0.04648	0.00932	0.01117	0.01695	0.01671
-50	0.0666	0.02379	0.00889	0.00877	0.2886	0.1173	0.10413	0.02577	0.67886	0.04262	0.12704	0.01886	0.55334	0.0625	0.02815	0.01087	0.03815	0.01327
-40	0.16651	0.04028	0.02068	0.00977	0.52939	0.07293	0.25821	0.03518	0.85529	0.01955	0.32764	0.04133	0.8248	0.0461	0.0896	0.01582	0.08942	0.02801
-30	0.34926	0.06234	0.0493	0.03643	0.7138	0.04787	0.51211	0.03998	0.95025	0.00952	0.60979	0.05242	0.95509	0.01947	0.24809	0.02885	0.24384	0.02244
-20	0.61032	0.06914	0.18823	0.05958	0.82911	0.03422	0.77711	0.03053	0.99036	0.00856	0.8409	0.04241	0.99394	0.00485	0.52758	0.04313	0.46451	0.03081
-10	0.84444	0.0477	0.38296	0.08876	0.8905	0.0235	0.93451	0.02007	0.99833	0.00235	0.95976	0.02185	0.99501	0.00997	0.81203	0.03233	0.71454	0.02999
0	0.96116	0.02068	0.61996	0.08756	0.92731	0.01521	0.99324	0.00977	0.98594	0.01512	0.99707	0.00587	0.98094	0.02758	0.96191	0.01536	0.89295	0.02101
10	0.99764	0.00337	0.82536	0.05627	0.94461	0.01384	0.99918	0.00142	0.96395	0.02239	0.9926	0.00812	0.95942	0.03866	0.99608	0.00784	0.97906	0.01436
20	0.99723	0.00372	0.95153	0.02328	0.95694	0.01134	0.97586	0.01916	0.94174	0.01567	0.96525	0.02188	0.93523	0.04108	0.99219	0.00505	0.98515	0.02742
30	0.98118	0.01309	0.99721	0.00557	0.96841	0.00915	0.93665	0.03479	0.92061	0.02725	0.92222	0.03401	0.91609	0.04542	0.98497	0.00682	0.97841	0.02627
40	0.96565	0.02776	0.99086	0.00626	0.97925	0.00698	0.85655	0.03252	0.92147	0.03281	0.89048	0.04899	0.90978	0.04969	0.98366	0.01291	0.97498	0.02358
50	0.95736	0.03438	0.97006	0.01365	0.98901	0.00441	0.83781	0.04378	0.93147	0.03843	0.87234	0.05513	0.91618	0.05154	0.98283	0.01678	0.9442	0.03506
60	0.95236	0.03824	0.95713	0.01744	1	0	0.85782	0.09138	0.95589	0.03479	0.85924	0.05915	0.9209	0.05303	0.98322	0.02003	0.91272	0.03529

## Sheet: Figure3
				Figure 3. Leucine mutations at W568, Y616 and F617 abolish inactivation of hERG.
	Data for Fig 3d
	WT				W568L				Y616L				F617L
Voltage (mV)	Normalized I	Standard Deviation		Voltage (mV)	Normalized I	Standard Deviation		Voltage (mV)	Normalized I	Standard Deviation		Voltage (mV)	Normalized I	Standard Deviation
-100	-0.0013	0.00276		-100	-0.00868	0.00253		-100	-0.0357	0.03193		-100	-0.02354	0.0179
-90	0.00161	0.00176		-90	-0.00764	0.00219		-90	-0.02728	0.0243		-90	-0.01791	0.01253
-80	0.000715292	0.00247		-80	-0.00645	0.00199		-80	-0.02087	0.0198		-80	-0.01373	0.00962
-70	-0.00104	0.0019		-70	-0.00532	0.002		-70	-0.01523	0.01636		-70	-0.01048	0.00792
-60	0.000120691	0.00281		-60	-0.00416	0.00186		-60	-0.00903	0.01172		-60	-0.00685	0.00562
-50	0.02582	0.02026		-50	-0.00248	0.00191		-50	-0.0033	0.00854		-50	-0.00328	0.00391
-40	0.11065	0.05561		-40	0.000277717	0.00201		-40	0.00342	0.00487		-40	0.00047974	0.00275
-30	0.29423	0.08813		-30	0.00489	0.00211		-30	0.00976	0.0042		-30	0.00514	0.00172
-20	0.59901	0.08379		-20	0.01131	0.00221		-20	0.01708	0.00507		-20	0.01076	0.000830638
-10	0.89516	0.02242		-10	0.01894	0.00276		-10	0.02495	0.00719		-10	0.01763	0.000250747
0	1	6.40988e-17		0	0.02789	0.00376		0	0.0334	0.01015		0	0.02562	0.00146
10	0.89776	0.08379		10	0.03872	0.00514		10	0.04294	0.01377		10	0.03526	0.00276
20	0.67538	0.17539		20	0.05212	0.00697		20	0.05418	0.01825		20	0.04689	0.00421
30	0.4176	0.16751		30	0.06883	0.00917		30	0.06781	0.02311		30	0.06086	0.00564
40	0.18916	0.03364		40	0.09038	0.01137		40	0.08523	0.02794		40	0.07836	0.00682
50	0.11496	0.01593		50	0.11993	0.01273		50	0.11129	0.03258		50	0.10123	0.00689
60	0.08937	0.01276		60	0.16269	0.01256		60	0.15309	0.03908		60	0.13313	0.0044
				70	0.2248	0.01369		70	0.22256	0.05219		70	0.17832	0.00564
				80	0.30844	0.01941		80	0.33019	0.06655		80	0.24221	0.01671
				90	0.40774	0.02578		90	0.47596	0.06903		90	0.32494	0.02922
				100	0.51327	0.02931		100	0.64774	0.05492		100	0.42144	0.03767
				110	0.61753	0.02941		110	0.82594	0.0298		110	0.52598	0.04033
				120	0.71774	0.02677		120	1	0		120	0.63507	0.0381
				130	0.81402	0.02088						130	0.7481	0.03155
				140	0.90746	0.01258						140	0.86712	0.02136
				150	1	4.53247e-17						150	1	5.55112e-17

## Sheet: Figure4
Figure 4. Voltage dependence of inactivation for mutations involved in the noncanonical path in hERG.
	Data for Fig 4k
	WT		T425L		L524R		A527L		L529H		L532H		W563L		A614G		T618L
Voltage (mV)	I/Imax	Standard Deviation	I/Imax	Standard Deviation	I/Imax	Standard Deviation	I/Imax	Standard Deviation	I/Imax	Standard Deviation	I/Imax	Standard Deviation	I/Imax	Standard Deviation	I/Imax	Standard Deviation	I/Imax	Standard Deviation
-180	0.98092	0.02326	0.99616	0.00572	0.99899	0.00201	0.98897	0.02467	0.99853	0.00255	1	0	0.99087	0.00751	0.99653	0.00777	0.9915	0.01444
-170	0.98256	0.01246	0.9913	0.00902	0.98908	0.00863	0.977	0.01623	0.99407	0.00547	0.97796	0.0069	1	0	0.97685	0.00637	0.98681	0.01455
-160	0.98526	0.01203	0.97843	0.01621	0.95712	0.01119	0.97272	0.02001	0.96203	0.00686	0.94071	0.0103	0.98952	0.00669	0.96043	0.01844	0.98019	0.0306
-150	0.97496	0.0218	0.95503	0.01401	0.90171	0.01493	0.9403	0.0265	0.9223	0.01117	0.89869	0.0199	0.96701	0.0163	0.94919	0.03151	0.99051	0.01872
-140	0.95841	0.04022	0.94205	0.0254	0.87902	0.04625	0.91471	0.04892	0.8701	0.0237	0.85888	0.02346	0.94662	0.0256	0.94312	0.03882	0.94113	0.04086
-130	0.93236	0.05151	0.919	0.0277	0.82661	0.01478	0.85072	0.03912	0.82378	0.01914	0.8111	0.02758	0.92069	0.01134	0.93416	0.04415	0.91196	0.06411
-120	0.86762	0.03873	0.90966	0.04093	0.73165	0.01562	0.77254	0.01503	0.78415	0.01815	0.7572	0.03452	0.90441	0.0183	0.90863	0.03853	0.8787	0.07888
-110	0.8499	0.0454	0.87702	0.05256	0.67005	0.0108	0.72957	0.01944	0.73591	0.01662	0.69821	0.04207	0.86319	0.01929	0.85393	0.03148	0.86058	0.07104
-100	0.79824	0.04744	0.82106	0.03417	0.61185	0.01633	0.66848	0.02879	0.67859	0.01513	0.63622	0.04875	0.80094	0.0215	0.77429	0.029	0.80302	0.07134
-90	0.72356	0.04825	0.79623	0.04381	0.5452	0.02187	0.5944	0.03877	0.61368	0.01356	0.57342	0.05349	0.72357	0.0208	0.67709	0.02807	0.72089	0.06813
-80	0.63505	0.04704	0.77397	0.04949	0.47207	0.02555	0.51153	0.04453	0.5426	0.01286	0.51171	0.05578	0.63959	0.01851	0.57264	0.03285	0.62909	0.06169
-70	0.54717	0.04616	0.73446	0.05711	0.40037	0.02704	0.42864	0.04886	0.46816	0.01287	0.4521	0.0564	0.5577	0.01947	0.4771	0.03284	0.53597	0.05341
-60	0.46355	0.04665	0.6811	0.06534	0.33332	0.02993	0.34577	0.05437	0.39398	0.01347	0.39593	0.05451	0.47741	0.01717	0.38976	0.03132	0.44801	0.04779
-50	0.39009	0.0467	0.61817	0.07204	0.27203	0.0282	0.27532	0.05622	0.32323	0.01479	0.34392	0.0522	0.4042	0.01754	0.31388	0.02874	0.37008	0.04432
-40	0.32384	0.04861	0.55215	0.07595	0.21794	0.02571	0.21896	0.05575	0.25856	0.01655	0.29592	0.04824	0.33539	0.01828	0.2492	0.02548	0.30238	0.03828
-30	0.26581	0.04872	0.48485	0.07638	0.17187	0.02204	0.16958	0.05251	0.20141	0.01824	0.25216	0.04521	0.27344	0.01668	0.19413	0.02286	0.25039	0.02808
-20	0.21504	0.04906	0.41892	0.07454	0.13187	0.02013	0.12893	0.05135	0.15087	0.01994	0.21192	0.04311	0.21828	0.01555	0.1456	0.01952	0.19955	0.02763
-10	0.16895	0.04603	0.35471	0.07208	0.09558	0.01698	0.08512	0.0346	0.1069	0.02088	0.17363	0.04111	0.16906	0.01617	0.10487	0.01495	0.1589	0.0261
0	0.12712	0.0432	0.29057	0.06461	0.06584	0.01425	0.05906	0.02711	0.06874	0.02065	0.13669	0.04093	0.12178	0.01371	0.0688	0.00934	0.12593	0.02398
10	0.08931	0.03845	0.23076	0.0565	0.03984	0.01113	0.03764	0.0231	0.03909	0.01763	0.10334	0.03893	0.07947	0.01261	0.03963	0.00446	0.09775	0.01901
20	0.05668	0.03222	0.17447	0.04801	0.02459	0.00812	0.02145	0.01766	0.01991	0.01208	0.0767	0.03203	0.04374	0.01008	0.01963	0.00441	0.07338	0.01585
30	0.03225	0.02232	0.11667	0.03472	0.0122	0.00503	0.01137	0.01154	0.00909	0.00705	0.05524	0.02272	0.0216	0.00915	0.00912	0.0021	0.05346	0.00988
40	0.014	0.01194	0.0689	0.02168	0.00461	0.00431	0.00807	0.01306	0.00365	0.00357	0.03884	0.01515	0.00911	0.00652	0.00353	0.00114	0.03749	0.00488
50	0.00354	0.00479	0.03841	0.00972	0.00286	0.00344	0.0104	0.01137	0.000938929	0.00137	0.0297	0.00963	0.00361	0.00352	0.00135	0.00179	0.02387	0.00369
60	0.000112965	0.00022593	0.022	0.00773	0.000470794	0.000941589	0.01087	0.01338	8.64724e-05	0.000149775	0.02458	0.00571	0.000115804	0.000200578	0.000293518	0.000656327	0.01439	0.00204
70			0.01451	0.00777			0.01457	0.01885									0.0086	0.00185
80			0.00517	0.00574			0.01624	0.01098									0.00512	0.0019
90			0.00375	0.00419			0.01975	0.02154									0.00245	0.00187
100			0	0			0.01151	0.0095									0	0

## Sheet: Figure5
Figure 5. Scatter plots comparing the betweenness centrality and the average minimal path length variation (Δdmin = dminMUT - dminWT, see Methods for the definition of dmin) of mutations along the noncanonical paths against the free-energy perturbation of activation (ΔΔGG) and of inactivation (ΔΔGI).
	Figure 5a
	|ΔΔGG|					Betweenness
	T425L	1.3	±	0.1		3.60	±	0.2
	L524R	0.4	±	0.1		1.12	±	0.2
	A527L	0.5	±	0.4		1.49	±	0.2
	L529H	2.1	±	0.4		2.60	±	0.2
	L532H	0.8	±	0.4		2.10	±	0.2
	W563L	2.4	±	0.5		3.75	±	0.3
	A614G	0.0	±	0.1		0.79	±	0.1
	T618L	0.4	±	0.1		2.50	±	0.3
	Figure 5b
	|ΔΔGI|					Betweenness
	T425L	0.7	±	0.1		4.58	±	0.2
	L524R	0.3	±	0.2		1.20	±	0.1
	A527L	0.3	±	0.1		0.19	±	0.1
	L529H	0.2	±	0.2		1.81	±	0.1
	L532H	0.1	±	0.2		3.00	±	0.1
	W563L	0.0	±	0.2		0.35	±	0.2
	A614G	0.6	±	0.2		2.75	±	0.4
	T618L	0.0	±	0.2		1.75	±	0.3
	Figure 5c
	ΔΔGG					Δdmin
	WT	0.0	±	0.0		0.0	±	0.0
	T425L	1.3	±	0.1		2.64	±	0.3
	L524R	-0.4	±	0.1		-2.94	±	0.4
	A527L	-0.5	±	0.4		-2.54	±	0.4
	L529H	-2.1	±	0.4		-3.72	±	0.5
	L532H	-0.8	±	0.4		-0.63	±	0.9
	W563L	-2.4	±	0.5		-4.42	±	0.3
	A614G	0.0	±	0.1		0.24	±	0.4
	T618L	0.4	±	0.1		0.34	±	0.4
	Figure 5d
	ΔΔGI					Δdmin
	WT	0.0	±	0.0		0.0	±	0.0
	T425L	0.7	±	0.1		4.94	±	0.3
	L524R	-0.3	±	0.2		-4.7	±	0.8
	A527L	-0.3	±	0.1		-3.91	±	0.5
	L529H	-0.2	±	0.2		-0.67	±	0.6
	L532H	0.1	±	0.2		3.87	±	0.8
	W563L	0.0	±	0.2		0.29	±	0.3
	A614G	-0.6	±	0.2		3.01	±	0.3
	T618L	0.0	±	0.2		-0.01	±	0.7
